# Supplementary material for: Evolution of Flavors in Extra Virgin Olive Oil Shelf-Life
Source: PubMed Central journal article supplement (PMC7997466; doi:10.3390/antiox10030368), 2021-02-28
Supplement: antioxidants-10-00368-s001.pdf [file antioxidants-10-00368-s001.pdf]

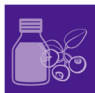

Table S1. Odor thresholds and sensory descriptors of aldehydes in olive oil. Adapted from [21].

| Compound                        | Chemical formula                       | Chemical structure | Sensory descriptor         | Odour threshold ( $\mu\text{g}/\text{kg}$ oil) | Ref.  |
|---------------------------------|----------------------------------------|--------------------|----------------------------|------------------------------------------------|-------|
| Acetaldehyde                    | $\text{C}_2\text{H}_4\text{O}$         |                    | Pungent, sweet             | 0.22                                           | [36]  |
| 3-methylbutanal                 | $\text{C}_5\text{H}_{10}\text{O}$      |                    | Malty                      | 5.4                                            | [36]  |
| 2-methylbutanal                 | $\text{C}_5\text{H}_{10}\text{O}$      |                    | Malty                      | 5.2                                            | [36]  |
| Pentanal                        | $\text{C}_5\text{H}_{10}\text{O}$      |                    | Woody, bitter, oily        | 240                                            | [107] |
| trans-2-pentenal                | $\text{C}_5\text{H}_8\text{O}$         |                    | Green, apple               | 300                                            | [107] |
|                                 |                                        |                    | Green, bitter almond       | 300                                            | [108] |
| Hexanal                         | $\text{C}_6\text{H}_{12}\text{O}$      |                    | Green, sweet               | 75                                             | [108] |
|                                 |                                        |                    | Green apple, grassy        | 80                                             | [107] |
|                                 |                                        |                    | Green                      | 300                                            | [36]  |
| cis-3-hexenal                   | $\text{C}_6\text{H}_{10}\text{O}$      |                    | Green                      | 3                                              | [108] |
|                                 |                                        |                    | Leaf-like                  | 1.7                                            | [36]  |
| trans-2-hexenal                 | $\text{C}_6\text{H}_{10}\text{O}$      |                    | Green, apple-like          | 424                                            | [36]  |
|                                 |                                        |                    | Bitter almonds, Green      | 420                                            | [107] |
|                                 |                                        |                    | Green astringent           | 1125                                           | [108] |
| Heptanal                        | $\text{C}_7\text{H}_{14}\text{O}$      |                    | Oily, fatty, woody         | 500                                            | [107] |
| trans-2-heptenal                | $\text{C}_7\text{H}_{12}\text{O}$      |                    | Oxidized, tallowy, pungent | 5                                              | [107] |
| 2,4-heptadienal                 | $\text{C}_7\text{H}_{10}\text{O}$      |                    | Fatty, rancid              | 3620                                           | [107] |
| Octanal                         | $\text{C}_8\text{H}_{16}\text{O}$      |                    | Fatty, sharp               | 320                                            | [107] |
|                                 |                                        |                    | Citrus-like                | 56                                             | [36]  |
| trans-2-octenal                 | $\text{C}_8\text{H}_{14}\text{O}$      |                    | Herbaceous, spicy          | 4                                              | [107] |
| Nonanal                         | $\text{C}_9\text{H}_{18}\text{O}$      |                    | Fatty, waxy, pungent       | 150                                            | [107] |
| trans,trans-2,4-nonadienal      | $\text{C}_9\text{H}_{14}\text{O}$      |                    | Soapy, penetrating;        | 2500                                           | [107] |
|                                 |                                        |                    | Deep-fried                 | 2500                                           | [36]  |
| cis-2-nonenal                   | $\text{C}_9\text{H}_{16}\text{O}$      |                    | Green, fatty               | 4.5                                            | [36]  |
| trans-2-nonenal                 | $\text{C}_9\text{H}_{16}\text{O}$      |                    | Paper-like, fatty          | 900                                            | [36]  |
| Decanal                         | $\text{C}_{10}\text{H}_{20}\text{O}$   |                    | Penetrating, sweet, waxy   | 650                                            | [107] |
|                                 |                                        |                    | Painty, fishy, fatty       | 10                                             | [107] |
| trans-2-decenal                 | $\text{C}_{10}\text{H}_{18}\text{O}$   |                    | Soapy, fatty               | 563                                            | [28]  |
|                                 |                                        |                    | Strong, fatty              | 2150                                           | [107] |
| trans,trans-2,4-decadienal      | $\text{C}_{10}\text{H}_{16}\text{O}$   |                    | Deep-fried                 | 180                                            | [36]  |
|                                 |                                        |                    | Deep-fried                 | 10                                             | [36]  |
| trans,cis-2,4-decadienal        | $\text{C}_{10}\text{H}_{16}\text{O}$   |                    | Deep-fried                 | 10                                             | [36]  |
| trans-4,5-epoxy-trans-2-decanal | $\text{C}_{10}\text{H}_{18}\text{O}_2$ |                    | Metallic                   | 1.3                                            | [36]  |

Table S2. Odor thresholds and sensory descriptors of alcohols in olive oil. Adapted from [21].

| Compound               | Chemical formula                  | Chemical structure                                                                  | Sensory descriptor                 | Odour threshold ( $\mu\text{g}/\text{kg}$ oil) | Ref.           |
|------------------------|-----------------------------------|-------------------------------------------------------------------------------------|------------------------------------|------------------------------------------------|----------------|
| Ethanol                | $\text{C}_2\text{H}_6\text{O}$    |    | Alcohol                            | 30000                                          | [107]          |
| Butan-2-ol             | $\text{C}_4\text{H}_{10}\text{O}$ |    | Winey                              | 150                                            | [107]          |
| 2-methylbutan-1-ol     | $\text{C}_5\text{H}_{12}\text{O}$ |    | Winey, spicy                       | 480                                            | [107]          |
| 3-methylbutan-1-ol     | $\text{C}_5\text{H}_{12}\text{O}$ |    | Woody, whiskey, sweet              | 100                                            | [107]          |
| Pentanol               | $\text{C}_5\text{H}_{12}\text{O}$ |    | Fruity<br>Strong, sticky, balsamic | 470<br>3000                                    | [108]<br>[107] |
| 3-penten-2-ol          | $\text{C}_5\text{H}_{10}\text{O}$ |    | Perfumery, woody                   | 400                                            | [107]          |
| Hexanol                | $\text{C}_6\text{H}_{14}\text{O}$ |    | Undesirable                        | 400                                            | [108]          |
| trans-2-hexen-1-ol     | $\text{C}_6\text{H}_{12}\text{O}$ |    | Green grass, leaves                | 5000                                           | [107]          |
| trans-3-hexen-1-ol     | $\text{C}_6\text{H}_{12}\text{O}$ |    | Green                              | 1500                                           | [107]          |
| cis-3-hexenol          | $\text{C}_6\text{H}_{12}\text{O}$ |    | Green                              | 6000                                           | [108]          |
| Heptan-2-ol            | $\text{C}_7\text{H}_{16}\text{O}$ |   | Earthy, sweet                      | 10                                             | [107]          |
| 6-Methyl-5-hepten-3-ol | $\text{C}_8\text{H}_{16}\text{O}$ |  | Perfumery, nutty                   | 2000                                           | [107]          |
| Octan-2-ol             | $\text{C}_8\text{H}_{18}\text{O}$ |  | Earthy, fatty                      | 100                                            | [107]          |
| Octen-3-ol             | $\text{C}_8\text{H}_{16}\text{O}$ |  | Mouldy, earthy                     | 1                                              | [107]          |
| Nonanol                | $\text{C}_9\text{H}_{20}\text{O}$ |  | Fatty<br>Rancid                    | 280<br>13500                                   | [107]<br>[108] |

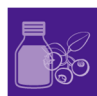

Table S3. Odor thresholds and sensory descriptors of esters and ketones in olive oil. Adapted from [21].

| Compound                    | Chemical formula                     | Chemical structure                                                                  | Sensory descriptor          | Odour threshold ( $\mu\text{g}/\text{kg}$ oil) | Ref.          |
|-----------------------------|--------------------------------------|-------------------------------------------------------------------------------------|-----------------------------|------------------------------------------------|---------------|
| Ethyl acetate               | $\text{C}_4\text{H}_8\text{O}_2$     |    | Sticky, sweet               | 940                                            | [107]         |
| Butan-2-one                 | $\text{C}_4\text{H}_8\text{O}$       |    | Ethereal, fruity            | 40000                                          | [107]         |
| 1-Penten-3-one              | $\text{C}_5\text{H}_8\text{O}$       |    | Green<br>Green, pungent     | 50<br>0.73                                     | [108]<br>[36] |
| Ethyl propanoate            | $\text{C}_5\text{H}_{10}\text{O}_2$  |    | Fruit, strong               | 100                                            | [107]         |
| Butyl acetate               | $\text{C}_6\text{H}_{12}\text{O}_2$  |    | Green, fruity, pungent      | 300                                            | [107]         |
| Ethyl butanoate             | $\text{C}_6\text{H}_{12}\text{O}_2$  |    | Sweet, fruity               | 30                                             | [107]         |
| Ethyl isobutyrate           | $\text{C}_6\text{H}_{12}\text{O}_2$  |    | Fruity                      | 1.2                                            | [36]          |
| Propyl butanoate            | $\text{C}_7\text{H}_{14}\text{O}_2$  |    | Pineapple, sharp            | 150                                            | [107]         |
| Heptan-2-one                | $\text{C}_7\text{H}_{14}\text{O}$    |   | Sweet, fruity               | 300                                            | [107]         |
| Ethyl 2-methylbutyrate      | $\text{C}_7\text{H}_{14}\text{O}_2$  |  | Fruity                      | 0.72                                           | [36]          |
| Ethyl 3-methylbutyrate      | $\text{C}_7\text{H}_{14}\text{O}_2$  |  | Fruity                      | 0.62                                           | [36]          |
| cis-1,5-Octadien-3-one      | $\text{C}_8\text{H}_{12}\text{O}$    |  | Geranium-like, mould        | 0.45                                           | [36]          |
| 6-Methyl-5-hepten-2-one     | $\text{C}_8\text{H}_{14}\text{O}$    |  | Pungent, green              | 1000                                           | [107]         |
| Octan-2-one                 | $\text{C}_8\text{H}_{16}\text{O}$    |  | Mould, green                | 510                                            | [107]         |
| Octen-3-one                 | $\text{C}_8\text{H}_{14}\text{O}$    |  | Mushroom, mould,<br>pungent | 10                                             | [107]         |
| cis-3-hexenyl acetate       | $\text{C}_8\text{H}_{14}\text{O}_2$  |  | Green<br>Banana-like        | 750<br>200                                     | [108]<br>[36] |
| Hexyl acetate               | $\text{C}_8\text{H}_{16}\text{O}_2$  |  | Green, fruity, sweet        | 1040                                           | [108]         |
| 2-methylpropyl butanoate    | $\text{C}_8\text{H}_{16}\text{O}_2$  |  | Unpleasant, winey, fusty    | 100                                            | [107]         |
| Ethyl cyclohexylcarboxylate | $\text{C}_9\text{H}_{16}\text{O}_2$  |  | Aromatic, fruity            | 0.16                                           | [36]          |
| trans- $\beta$ -Damascenone | $\text{C}_{13}\text{H}_{18}\text{O}$ |  | Boiled apple-like           | 11                                             | [36]          |

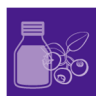

Table S4. Odor thresholds and sensory descriptors of carboxylic acids and other compounds present in olive oil. Adapted from [21].

| Compound                         | Chemical formula                    | Chemical structure | Sensory descriptor                    | Odour threshold ( $\mu\text{g}/\text{kg}$ oil) | Ref.         |
|----------------------------------|-------------------------------------|--------------------|---------------------------------------|------------------------------------------------|--------------|
| Acetic acid                      | $\text{C}_2\text{H}_4\text{O}_2$    |                    | Sour, vinegary                        | 500                                            | [107]        |
| Propanoic acid                   | $\text{C}_3\text{H}_6\text{O}_2$    |                    | Pungent, sour                         | 720                                            | [107]        |
| Butanoic acid                    | $\text{C}_4\text{H}_8\text{O}_2$    |                    | Rancid, cheese                        | 650                                            | [107]        |
| 3-Methylbutyric acid             | $\text{C}_5\text{H}_{10}\text{O}_2$ |                    | Sweaty                                | 22                                             | [36]         |
| Pentanoic acid                   | $\text{C}_5\text{H}_{10}\text{O}_2$ |                    | Unpleasant, pungent                   | 600                                            | [107]        |
| Hexanoic acid                    | $\text{C}_6\text{H}_{12}\text{O}_2$ |                    | Pungent, rancid                       | 700                                            | [107]        |
| 4-Methoxy-2-methyl-2-butanethiol | $\text{C}_6\text{H}_{14}\text{OS}$  |                    | Black currant-like, catty             | 0.017                                          | [36]         |
| Guaiacol                         | $\text{C}_7\text{H}_8\text{O}_2$    |                    | Phenolic, burnt<br>Soapy, olive paste | 16<br>24.1                                     | [36]<br>[28] |
| Heptanoic acid                   | $\text{C}_7\text{H}_{14}\text{O}_2$ |                    | Rancid, fatty                         | 100                                            | [107]        |
| Octanoic acid                    | $\text{C}_8\text{H}_{16}\text{O}_2$ |                    | Oily, fatty                           | 3000                                           | [107]        |
| Octane                           | $\text{C}_8\text{H}_{18}$           |                    | Sweety, alcane                        | 940                                            | [107]        |
